# Supplementary material for: STAT1 itaconation prevents macrophage cytolistic mtDNA -induced inflammation in Wear Particle-Induced Aseptic Loosening
Source: Research Square preprint supplement (doi:10.21203/rs.3.rs-7476581/v1), 2025-09-12
Supplement: Supplementary file 1 [file 7263c1f95dadcc7ad73d0684.docx]

**Supporting Information:**

**Title: STAT1 itaconation prevents macrophage cytolistic mtDNA -induced inflammation in Wear Particle-Induced Aseptic Loosening.**

Authors:Yifan Yu1#, Taihe Liu1#, Chenhao Pan1#, Haopeng Sun1, Zhipeng Chen1, Haoxian Liu1, Wingcheuk Ko1, Siyuan Tan1, Jiankai Luo1, Shixun Li1, Changchuan Li1, Yue Ding1*

Insititution: 1 Department of Orthopedic Surgery, Sun Yat-Sen Memorial Hospital, Sun Yat-Sen University, Guangzhou, 510120, PR China.

#These authors contribute equally as first author.

*Corresponding author: dingyue@mail.sysu.edu.cn.

The Supporting Information file is 7 pages containing 4 figures.


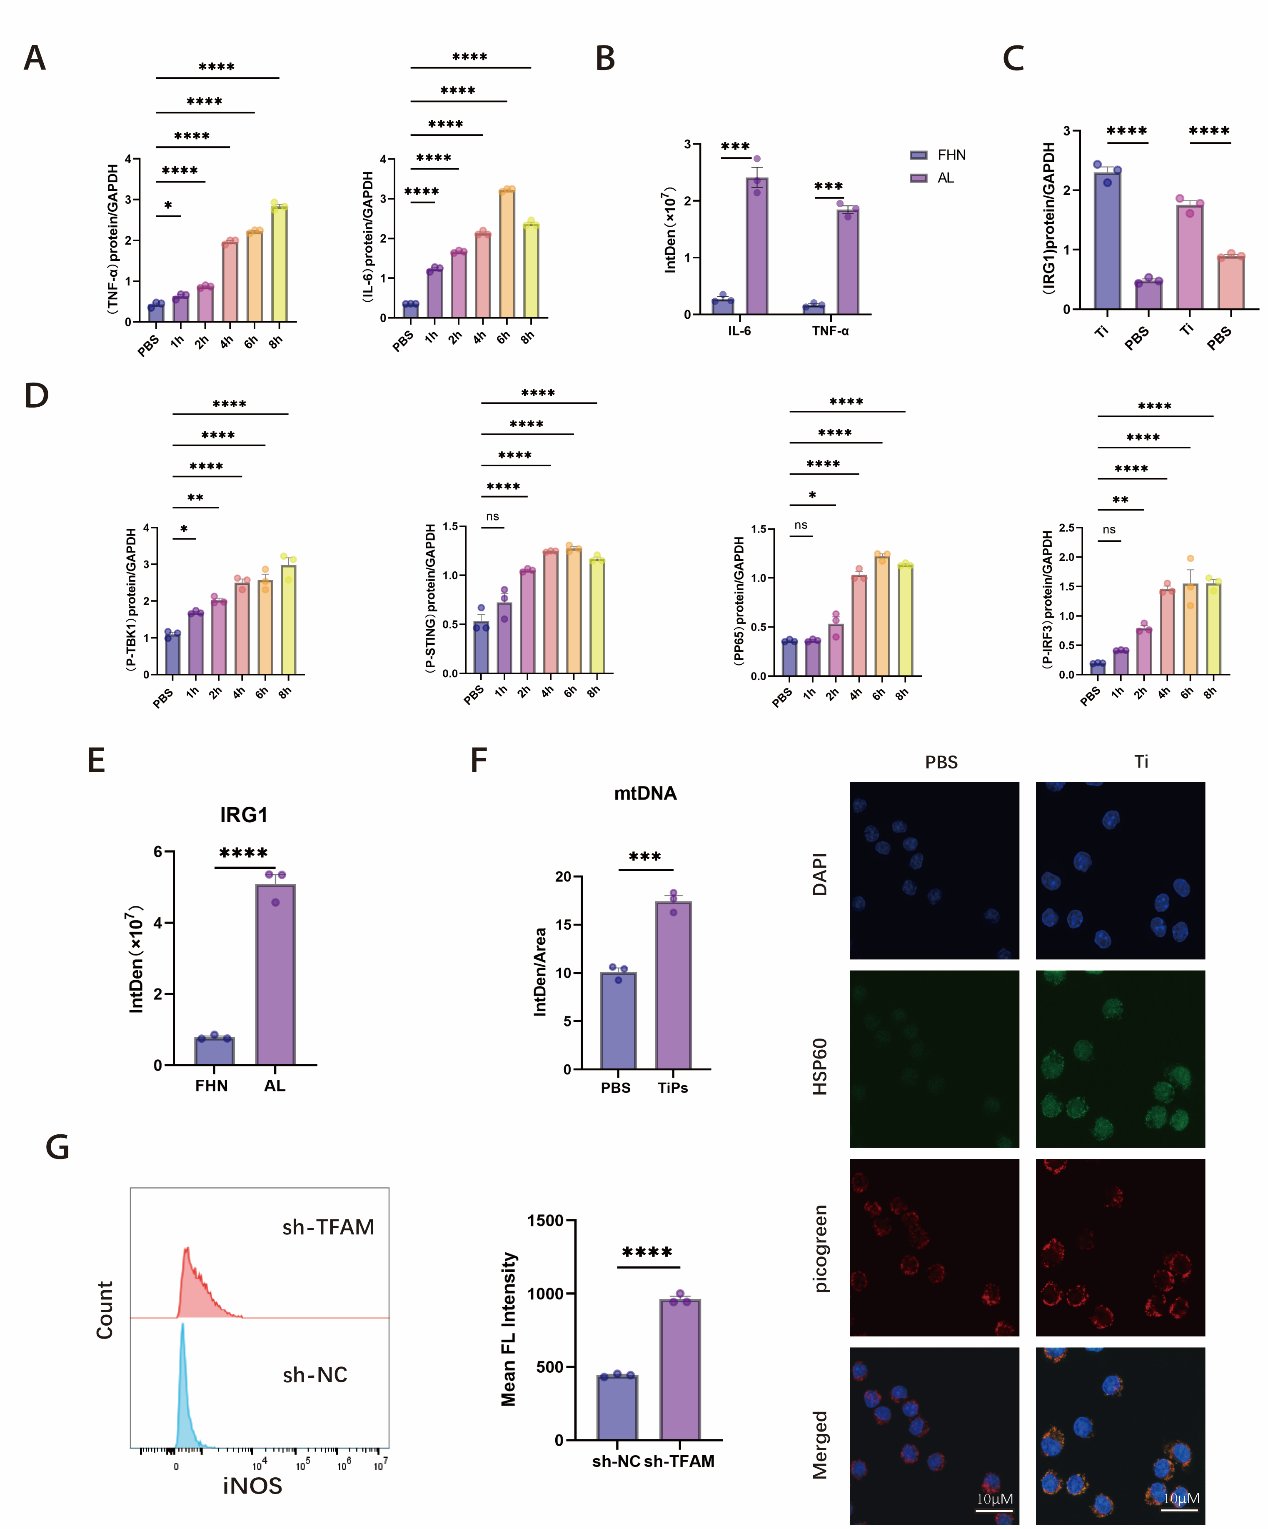


**Figure S1：**(A) Western blot analysis of TNF-α and IL-6 in macrophages following TiPs stimulation at different time points. (B) The average intensity of TNF-α and IL-6 IHF staining was calculated using ImageJ analysis. (C) Western blot analysis of IRG1 protein expression after TiPs stimulation. (D) Western blot analysis of P-TBK1,P-STING,P-IRF 3 and PP65 in macrophages following TiPs stimulation at different time points. (E) IF staining results showed an increase in intracellular mtDNA after TiPs treatment. (F) The average intensity of IRG1 IHF staining was calculated using ImageJ analysis. (G) Flow cytometry results showing an increased proportion of iNOS-positive macrophages after TFAM knockdown, along with corresponding data analysis. Statistical data are presented as mean ± standard deviation and were analyzed using unpaired t-tests or one-way ANOVA. *p<0.05, **p<0.01, ***p<0.001, and ****p<0.0001; ns, not significant.


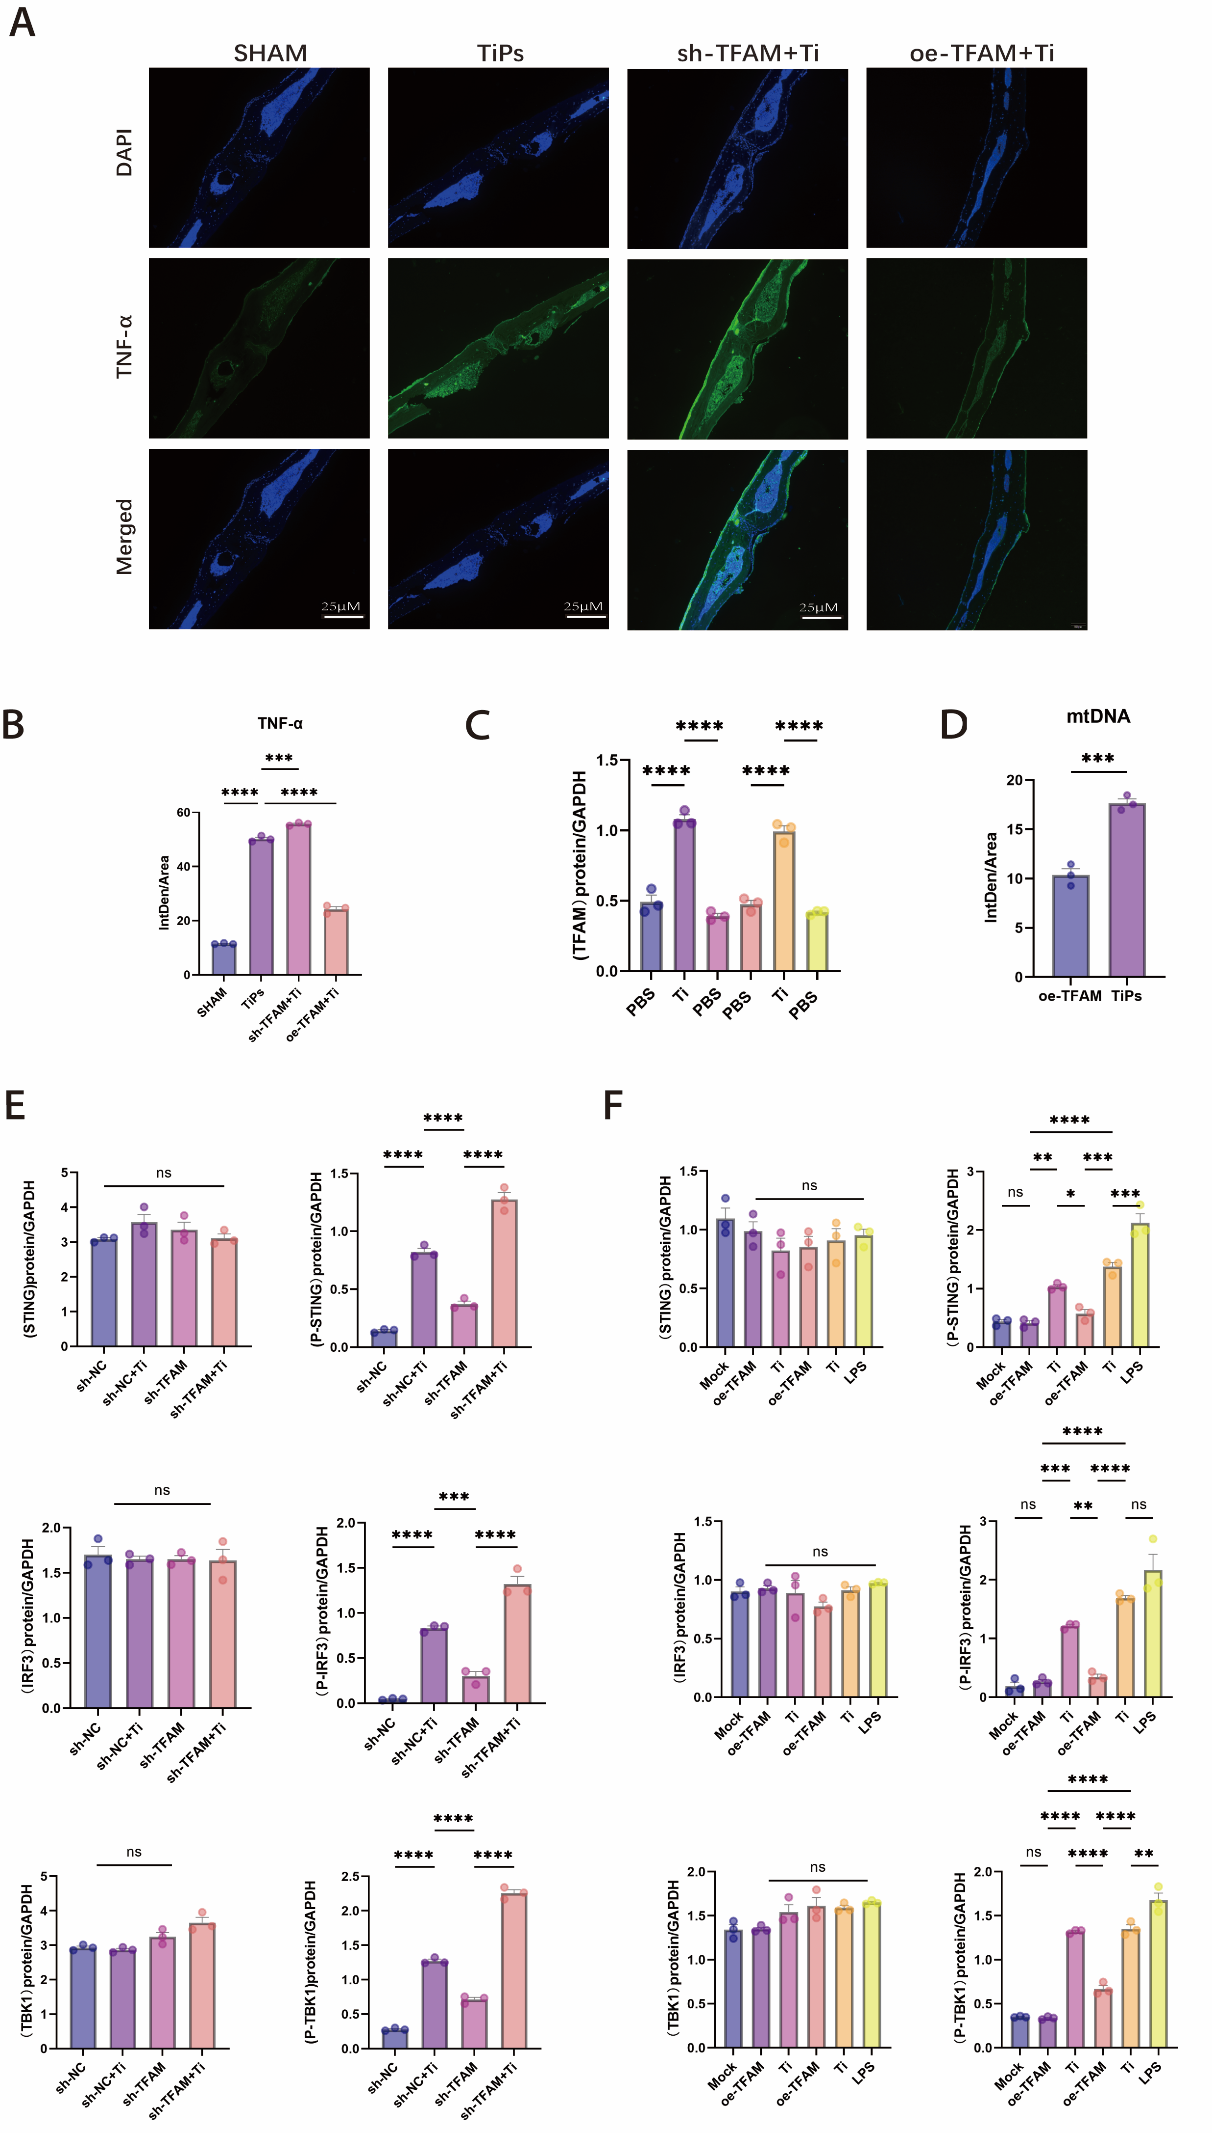


**Figure S2：** (A,B) Images of TNF-α Staining in Mouse Skull Sections and the average intensity was calculated using ImageJ analysis. (C) Western blot analysis of TFAM protein expression in macrophages stimulated with TiPs. (D) Quantitative IHF staining results for mtDNA after oe-TFAM. (E) Western blot analysis of STING pathway protein expression in macrophages after TFAM knockdown. (F) Western blot analysis of STING pathway protein expression in macrophages after TFAM overexpression. Statistical data are presented as mean ± standard deviation and were analyzed using unpaired t-tests or one-way ANOVA. *p<0.05, **p<0.01, ***p<0.001, and ****p<0.0001; ns, not significant.


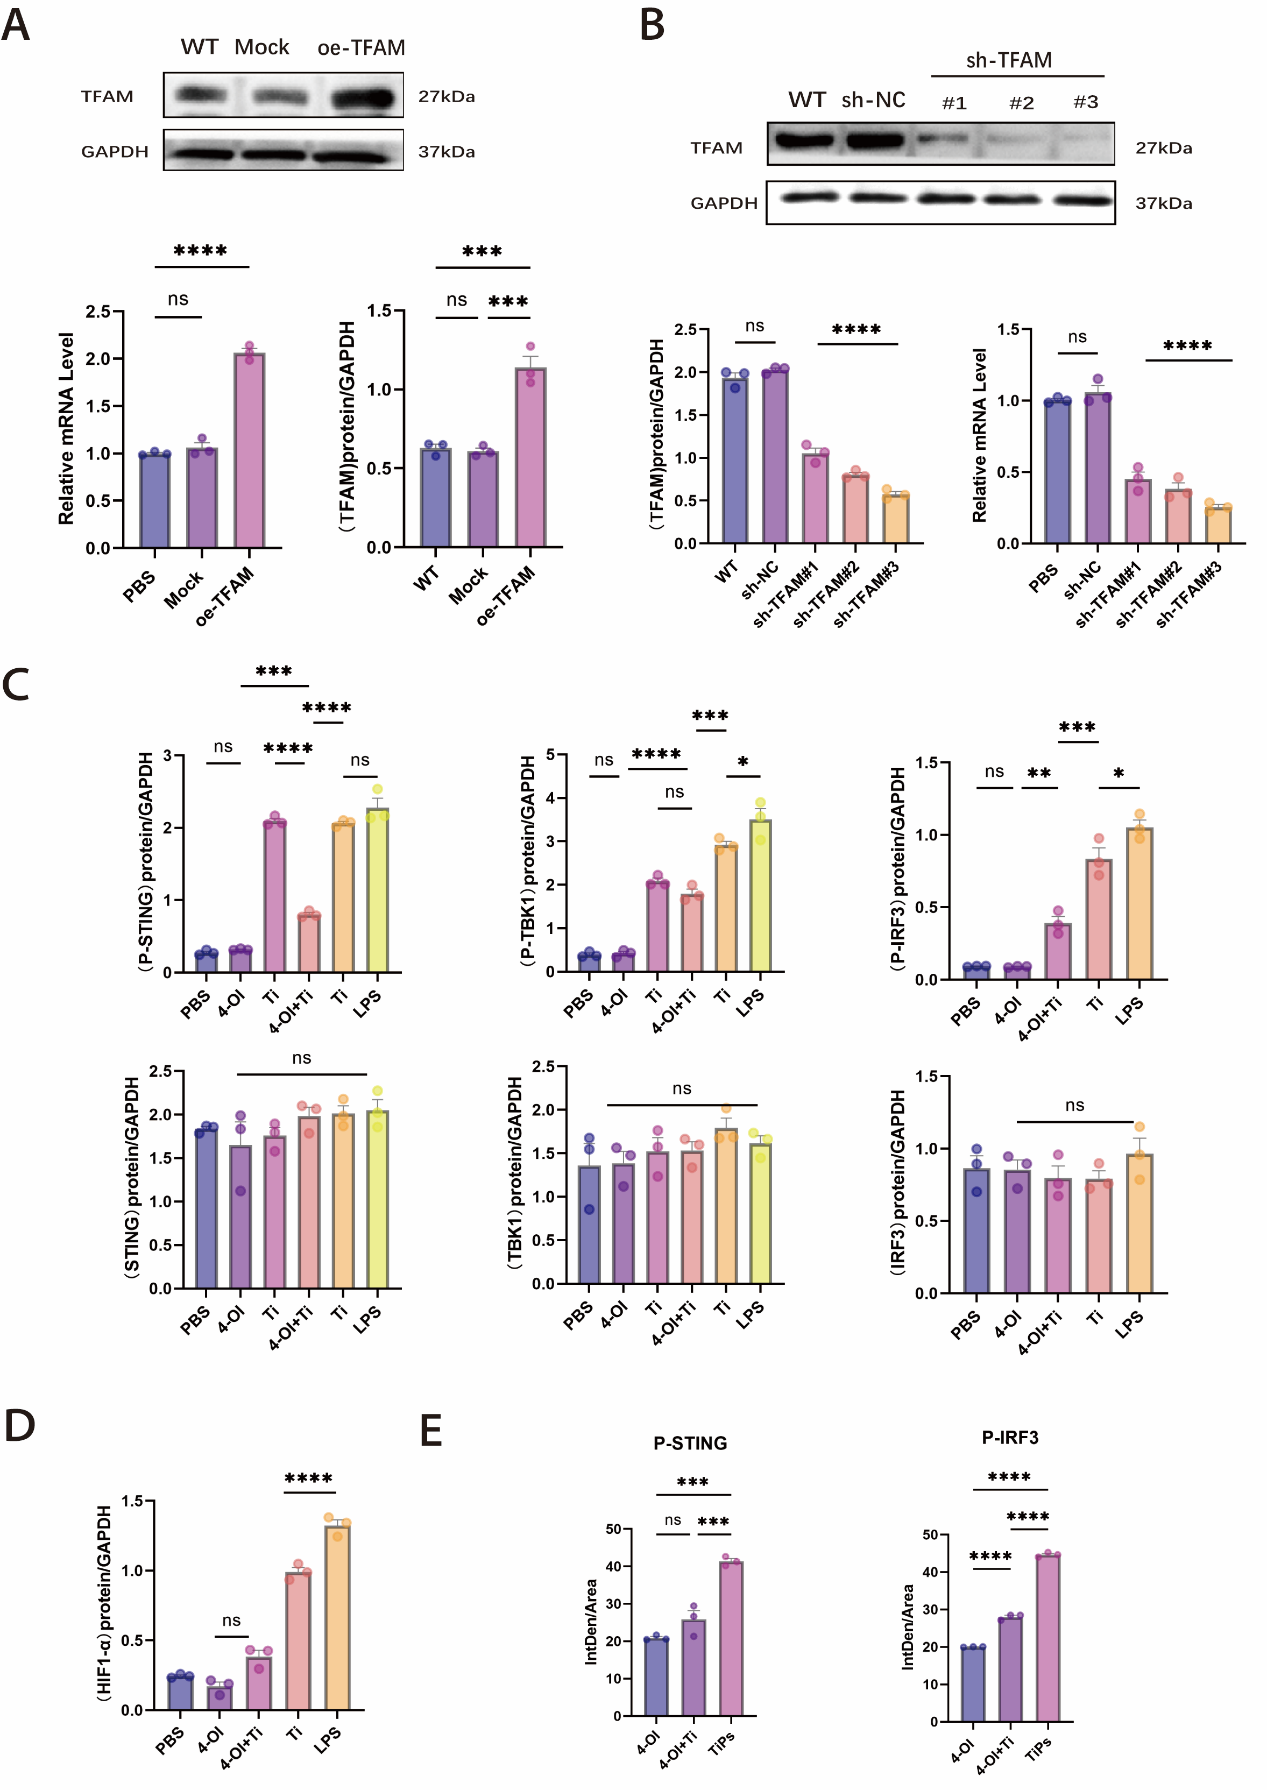


**Figure S3：** (A) Analysis of TFAM protein and mRNA expression in macrophages after TFAM overexpression. (B) Analysis of TFAM protein and mRNA expression in macrophages after TFAM knockdown. (C) Western blot analysis of STING pathway protein expression in macrophages after 4-OI treatment. (D) Western blot analysis of HIF1-α protein expression after 4-OI treatment. (E) Quantitative IF staining results for STING and IRF3 after 2-hour incubation with 4-OI. Statistical data are presented as mean ± standard deviation and were analyzed using unpaired t-tests or one-way ANOVA. *p<0.05, **p<0.01, ***p<0.001, and ****p<0.0001; ns, not significant.


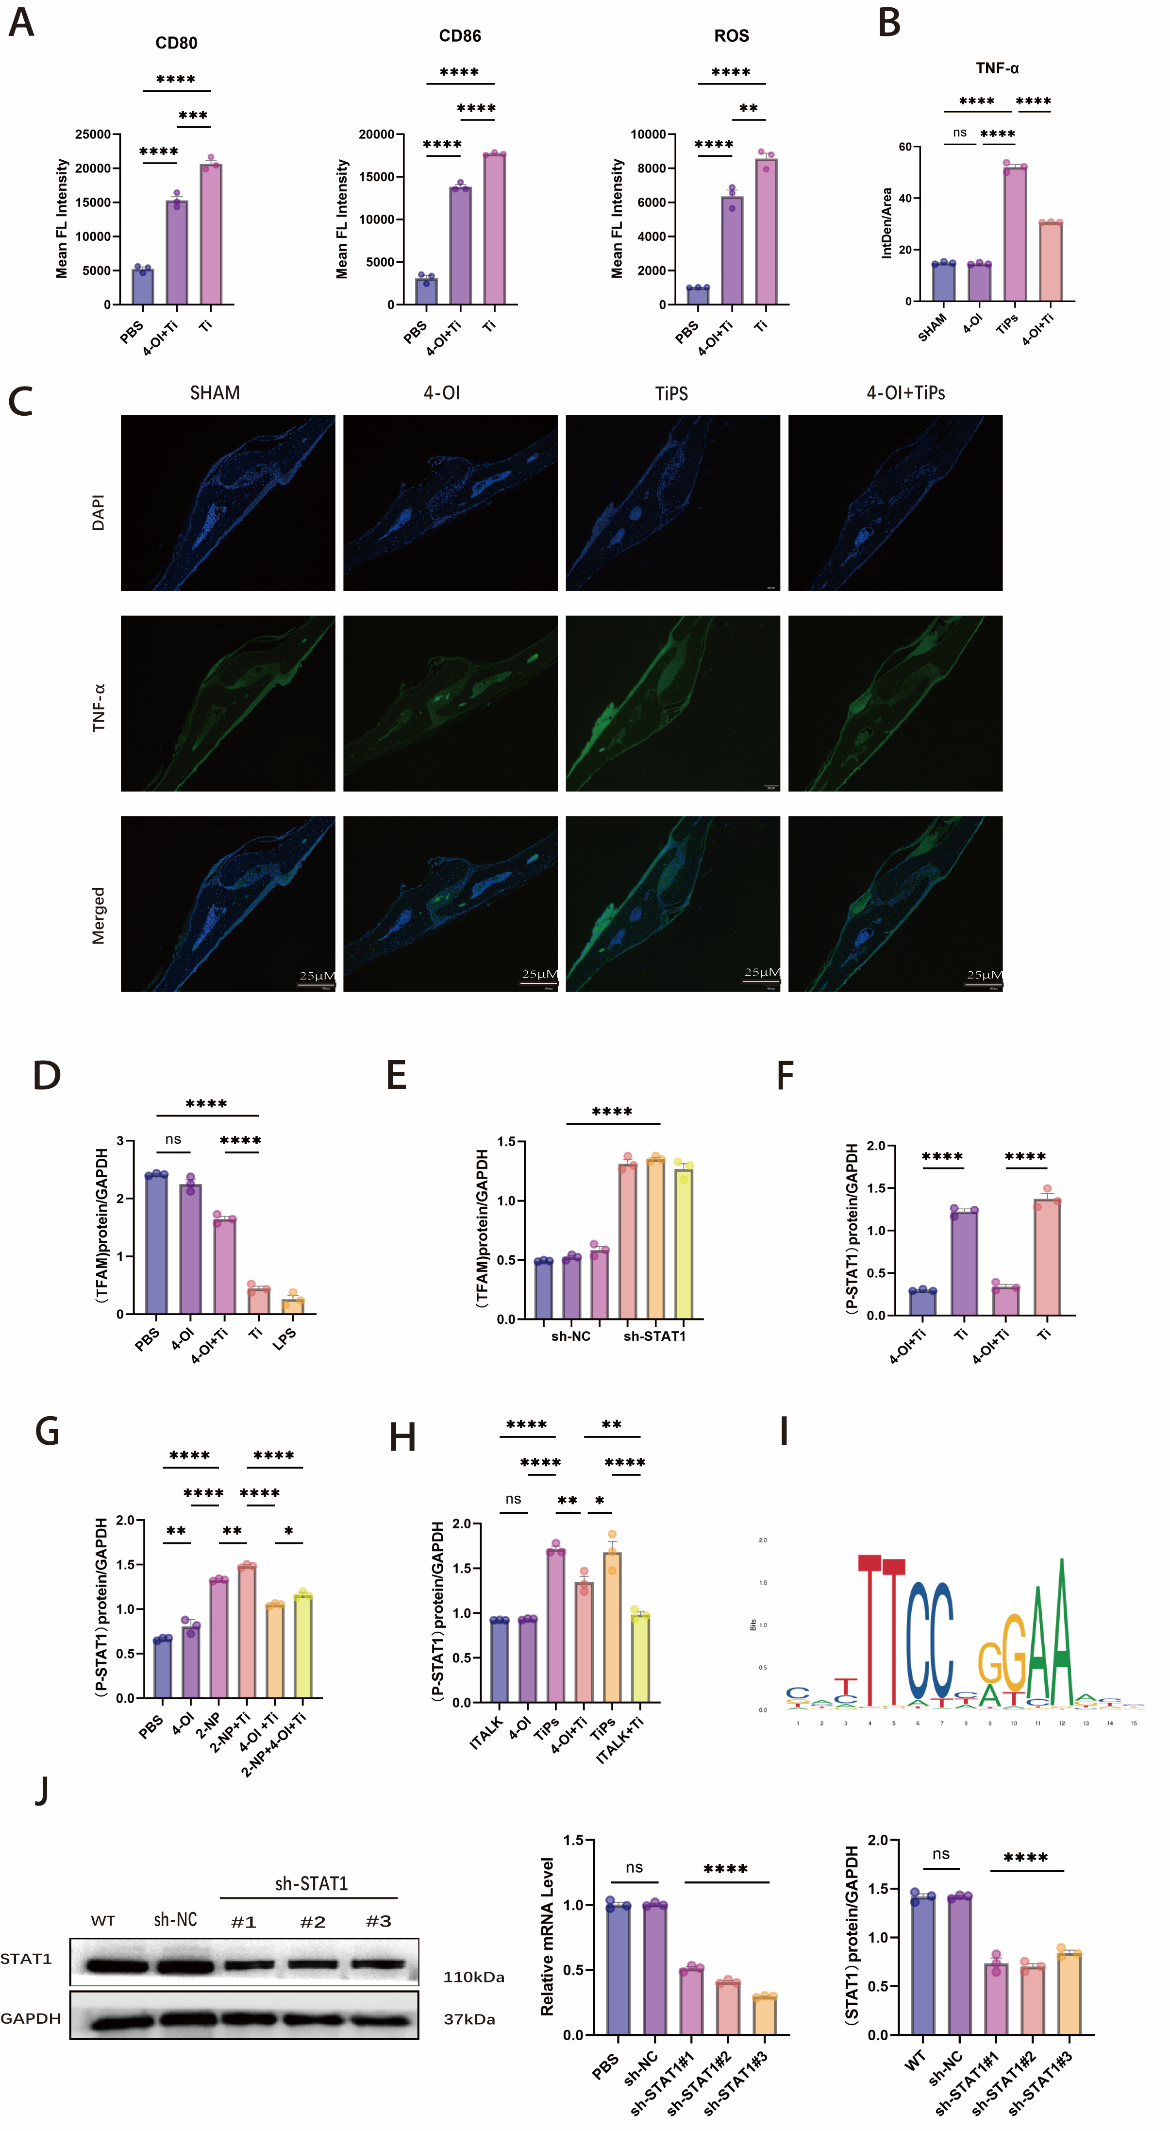


**Figure S4：** (A) Quantification of flow cytometry results of CD80⁺, CD86⁺, and ROS⁺ after 4-OI addition (B.C) Images of TNF-α Staining in Mouse Skull Sections and the average intensity was calculated using ImageJ analysis. (D) Western blot analysis of TFAM protein expression after 4-OI treatment. (E) Western blot analysis of TFAM expression after STAT1 knockdown. (F) Western blot analysis of P-STAT1 protein expression after 4-OI treatment. (G) Western blot analysis of P-STAT1 protein expression after 4-OI and 2-NP treatment. (H) Western blot analysis of P-STAT1 protein expression after 4-OI and ITALK treatment. (I) The STAT1–TFAM binding sequence obtained from the JASPAR database. (J) Analysis of STAT1 protein and mRNA expression in macrophages after STAT1 knockdown. Statistical data are presented as mean ± standard deviation and were analyzed using unpaired t-tests or one-way ANOVA. *p<0.05, **p<0.01, ***p<0.001, and ****p<0.0001; ns, not significant.
